# Supplementary material for: Long-persistent luminescence by host–guest Förster resonance energy transfer
Source: Royal Society of Chemistry journal article supplement (doi:10.1039/d4sc04746j), 2024-01-01
Supplement: d4sc04746j9.pdf [file d4sc04746j9.pdf]

## Supporting Information

### **Long-Persistent Luminescence by Host-Guest**

### **Förster Resonance Energy Transfer**

*Hui-Li Sun, Qiang-Sheng Zhang, Zhong-Hao Wang, Yan-Ting Huang, and Mei Pan\**

H.-L. Sun, Z.-H. Wang, Y.-T. Huang, Prof. M. Pan

MOE Laboratory of Bioinorganic and Synthetic Chemistry,

Lehn Institute of Functional Materials,

IGCME, GBRCE for Functional Molecular Engineering,

School of Chemistry, Sun Yat-Sen University Guangzhou 510006, P. R. China

E-mail: panm@mail.sysu.edu.cn

Dr. Q.-S. Zhang

Hainan Provincial Key Laboratory of Fine Chem,

School of Chemistry and Chemical Engineering,

Hainan University

Haikou 570228, P. R. China.cn

## 1. Experimental Section

### Materials and Instrumentations

All reaction materials were obtained from commercial suppliers and used without further purification. IR spectra were recorded using Nicolet/Nexus-670 FT-IR spectrometer in the region of 4000-400  $\text{cm}^{-1}$  using KBr pellets. A Mini-Pellet Press of Specac is used to compress the samples. The single-crystal structures were determined by the Rigaku X-ray single-crystal diffraction system SuperNova with monochromator Cu-K $\alpha$  radiation ( $\lambda = 1.54184 \text{ \AA}$ ). NMR spectra were recorded on a JEOL EX270 spectrometer ( $^1\text{H}$ : 400 MHz;  $^{13}\text{C}$ : 100 MHz). UV-Visible absorption spectra were recorded using a Shimadzu UV-2450 spectrophotometer. Fluorescence spectra and decay lifetimes were measured by Edinburgh FLS 1000 spectrometer. The emission quantum yields were measured on a Hamamatsu C9920-02G absolute PL quantum yield measurement system.

### X-ray single crystal structural analysis

Single-crystal X-ray diffraction data for **DPSD** and **DPOD** were collected on a Rigaku Oxford SuperNova X-RAY diffractometer system equipped with a Cu sealed tube ( $\lambda = 1.54178 \text{ \AA}$ ) at 50 kV and 0.80 mA. The structure was solved by direct methods, and refined by full-matrix least-square methods with the SHELXL-2014 program package.<sup>[1]</sup> All hydrogen atoms were located in calculated positions and refined anisotropically. The crystallographic data for **DPSD** and **DPOD** were listed in Table S1. The single crystal data have been deposited in the Cambridge Crystallographic Data Center (CCDC No: 2312419, 2312421). The data can be obtained free of charge from The Cambridge Crystallographic Data Centre ( **$\alpha$ -Cellulose**: (CCDC No : 810597)).

### Calculation methods

Simulation calculations of **DPSD+ $\alpha$ -Cellulose** and **DPOD+ $\alpha$ -Cellulose**, **DPSD** and **DPOD**, were carried out with Gaussian 09 program package.<sup>[2]</sup> **DPSD+ $\alpha$ -Cellulose** and **DPOD+ $\alpha$ -Cellulose**, **DPSD** and **DPOD** at the level of CAM-B3LYP-GD3(BJ)/6-311G\*\* have been evaluated. Time-dependent density functional theory (TD-DFT) calculations were performed based on the optimized molecular structure. The frontier molecular orbitals (FMOs) analysis were carried out by Multiwfn program<sup>[3-4]</sup>. All orbitals were visualized by VMD (isovalue = 0.02).<sup>[5]</sup>

## Synthesis of the DPSD

The synthesis of 4,4'-((2,5-dicyano-1,4-phenylene)bis(sulfanediyl))dibenzoic acid (**DPSD**).<sup>[6]</sup> 2,5-dibromophthalonitrile (100 mg, 0.35 mmol), 4-mercaptobenzoic acid (162 mg, 1.05 mmol) and potassium carbonate (290 mg, 2.1 mmol) were added under nitrogen into a 100 mL round bottom flask followed by the addition of dry DMF (10 mL). The solution was stirred at 50 °C for 24 h. Then the reaction was quenched very carefully with 4 M HCl (30 mL), the product precipitated as lightly green solid. This solid was separated by filtration and washed with distilled water. The product recrystallized in DMF and was dried under vacuum. (Yield 150 mg, 57%). Molecular formula: C<sub>22</sub>H<sub>12</sub>N<sub>2</sub>O<sub>4</sub>S<sub>2</sub>. <sup>1</sup>H NMR (400 MHz, DMSO-*d*<sub>6</sub>): δ (ppm) 13.11 (s, 2H), 8.08 (d, 4H, J = 8.5 Hz), 7.96 (s, 2H), 7.52 (d, 4H, J = 12 Hz); <sup>13</sup>C NMR (100 MHz, DMSO-*d*<sub>6</sub>): δ (ppm) 167.07, 138.70, 138.37, 138.11, 137.83, 131.13, 131.07, 119.55, 115.55. IR (KBr, cm<sup>-1</sup>): 3428(m), 3091 (w), 2994 (w), 2820 (w), 2663 (w), 2555(w), 2233(w), 2026(w), 1694 (s), 1586 (s), 1388 (s), 1288 (s), 1172 (w), 1123 (w), 1016 (w), 941 (w), 866 (w), 808 (w), 758(w), 692(w), 643(w), 560(w).

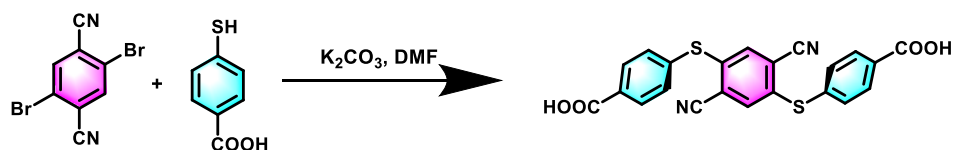

## Synthesis of the DPOD

The synthesis of 4,4'-((2,5-dicyano-1,4-phenylene)bis(oxy))dibenzoic acid (**DPOD**). Tetrachloroterephthalonitrile (200.00 mg, 0.75 mmol), 4-hydroxybenzoic acid (616.5 mg, 4.5 mmol) and potassium carbonate (1.66 g, 12 mmol) were added under nitrogen into a 100 mL round bottom flask followed by the addition of dry DMF (10 mL). The solution was stirred at 80 °C for 48 h. Then the reaction was quenched very carefully with 4 M HCl (30 mL), the product precipitated as white solid. This solid was separated by filtration and washed with distilled water. The product recrystallized in ethanol and was dried under vacuum. (Yield 194.0 mg, 45%). Molecular formula: C<sub>22</sub>H<sub>12</sub>N<sub>2</sub>O<sub>6</sub>. <sup>1</sup>H NMR (400 MHz, DMSO-*d*<sub>6</sub>): δ (ppm) 12.95 (s, 2H), 8.04 (d, 4H, J = 8.0 Hz), 8.00 (s, 2H), 7.30 (d, 4H, J = 12.0 Hz); <sup>13</sup>C NMR (100 MHz, DMSO-*d*<sub>6</sub>): δ (ppm) 167.06, 159.66, 153.52, 132.34, 127.79, 126.16, 118.44, 114.27, 111.00. IR (KBr, cm<sup>-1</sup>): ν = 3428 (m), 2810 (w), 2553 (w), 2236 (w), 2027 (w), 1689 (s), 1603 (s), 1490 (m), 1399 (m), 1346 (m), 1281 (m), 1227 (m), 1168 (m), 1013 (m), 888 (m), 846 (m), 765 (m), 690 (w), 658 (w), 545 (w), 492 (w).

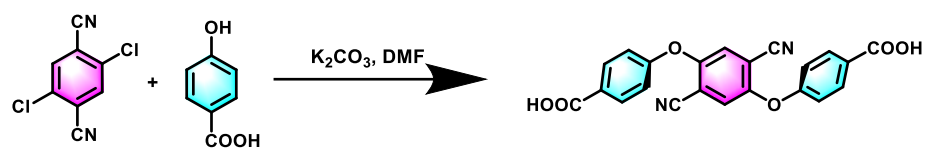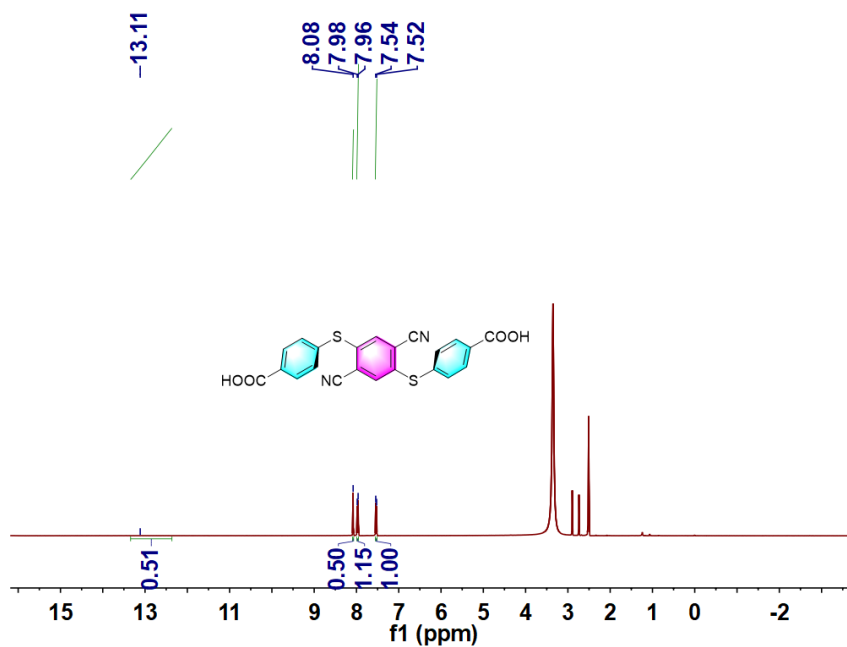

**Figure S1.**  $^1\text{H}$  NMR spectrum of **DPSD** in DMSO- $d_6$ .

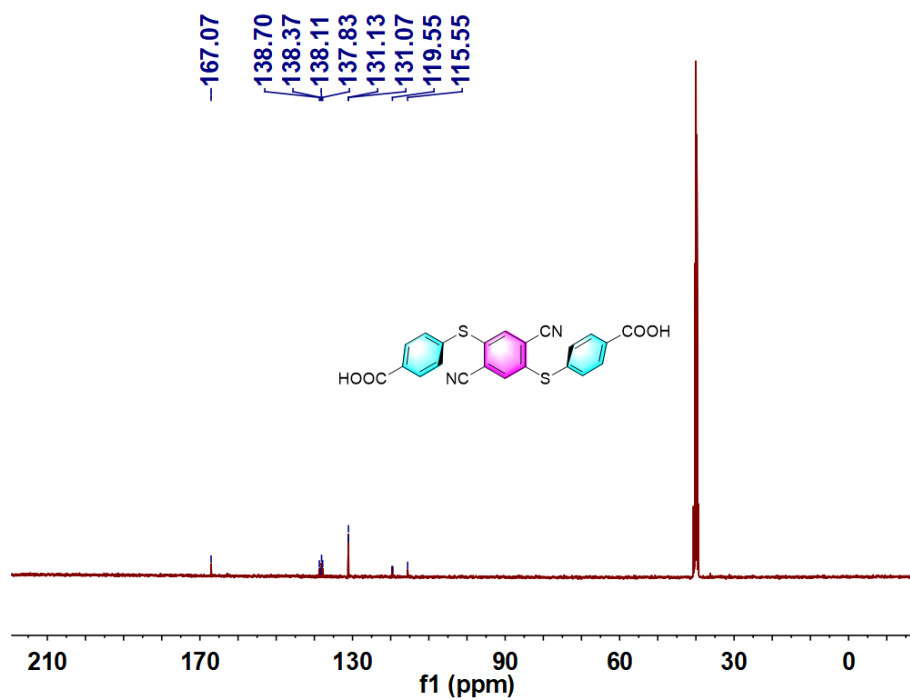

**Figure S2.**  $^{13}\text{C}$  NMR spectrum of **DPSD** in DMSO- $d_6$ .

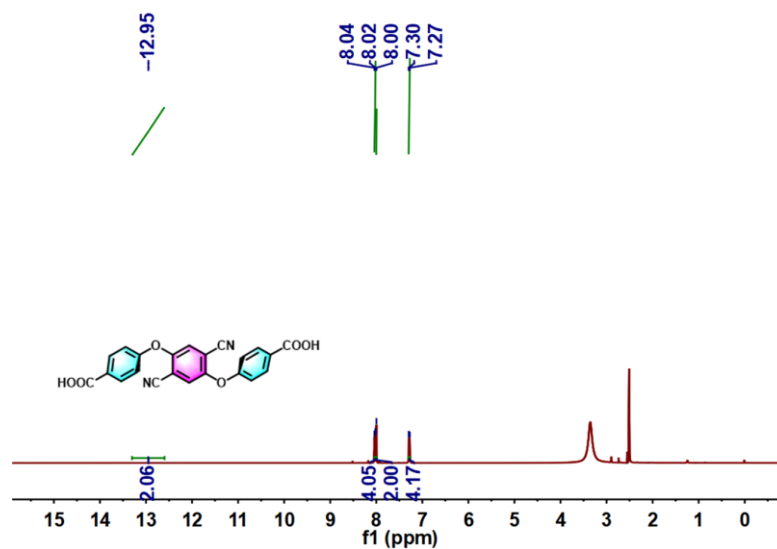

Figure S3.  $^1\text{H}$  NMR spectrum of DPOD in  $\text{DMSO-}d_6$ .

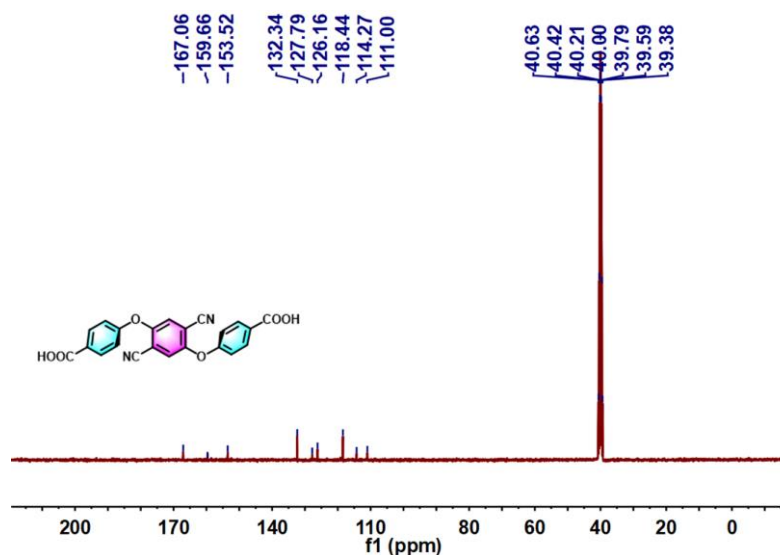

Figure S4.  $^{13}\text{C}$  NMR spectrum of DPOD in  $\text{DMSO-}d_6$ .

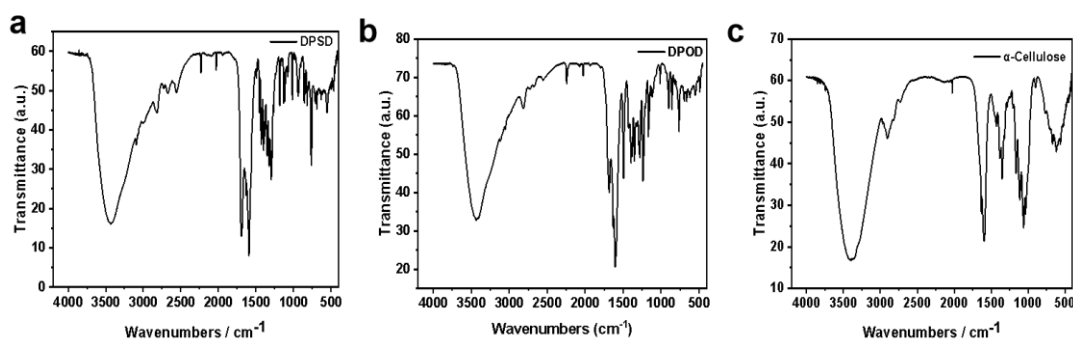

Figure S5. FT-IR spectra of (a) DPSD, (b) DPOD and (c)  $\alpha$ -Cellulose.

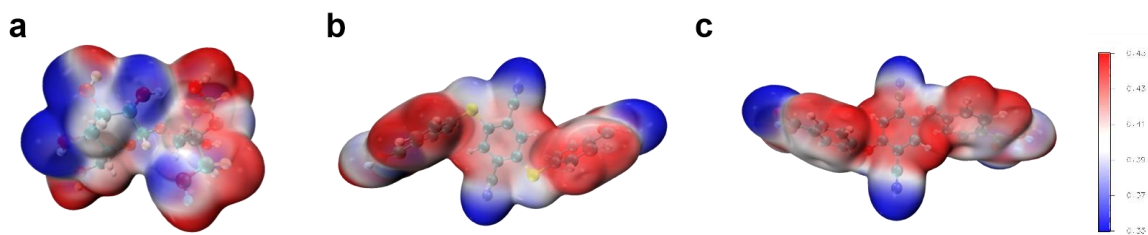

**Figure S6.** The electrostatic potential (ESP) surfaces of (a)  $\alpha$ -Cellulose, (b) DPSD and (c) DPOD.

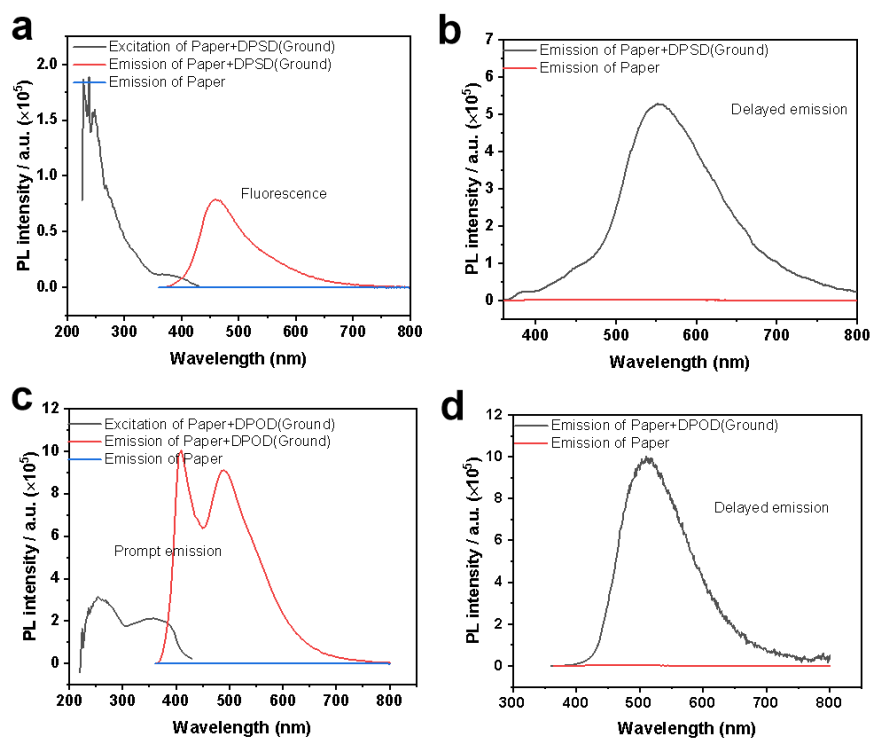

**Figure S7.** Prompt excitation and emission spectra of **paper**, **paper+DPSD** (a), **paper+DPOD** (c) and delayed emission spectra of **paper**, **paper+DPSD** (b), **paper+DPOD** (d) under 340 nm excitation.

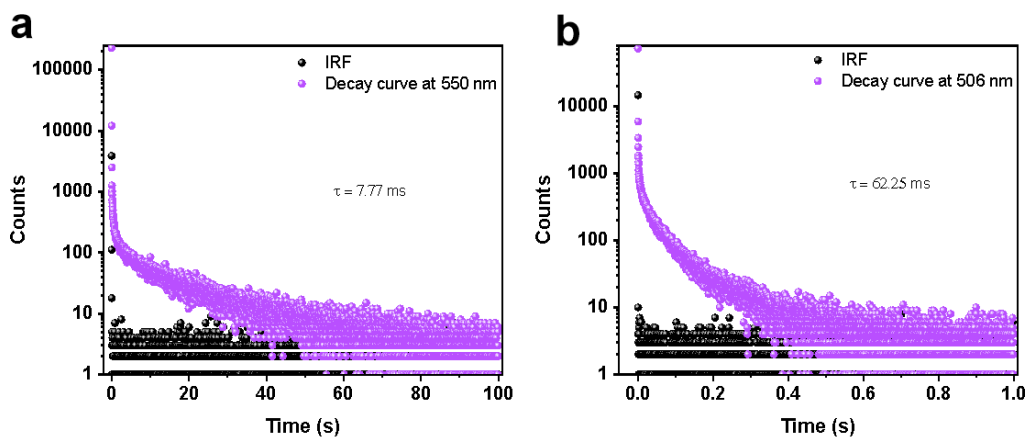

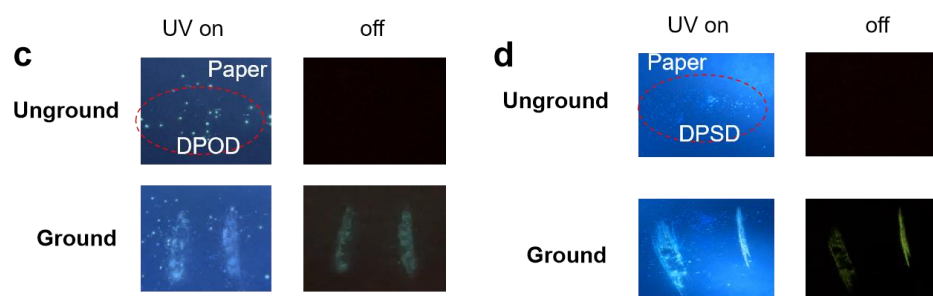

**Figure S8.** Decay curves of **paper+DPSD** at 550 nm (a) and **paper+DPOD** at 506 nm (b) under 340 nm excitation; (c) Place **DPOD** and (d) **DPSD** on filter paper, grinding the sample on the paper, and recording the photographs before and after grinding, respectively.

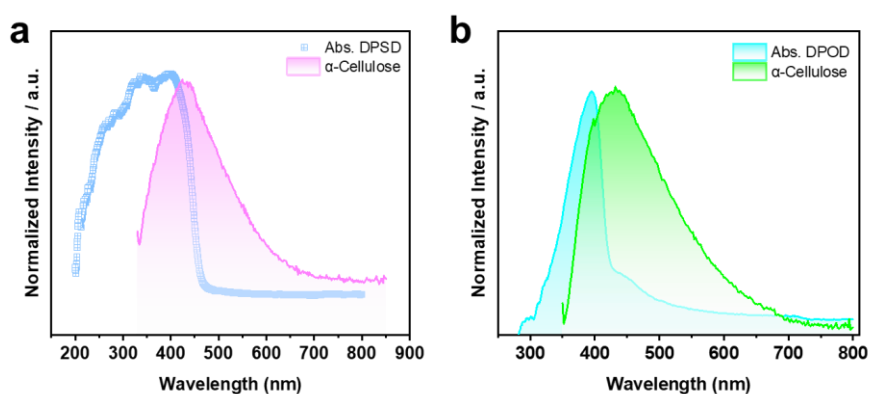

**Figure S9.** (a) PL spectrum (red curve) of donor ( $\alpha$ -Cellulose) under 340 nm excitation and UV-visible absorption spectrum of acceptor (**DPSD**) (blue curve); (b) PL spectrum (green curve) of donor ( $\alpha$ -Cellulose) under 340 nm excitation and UV-visible absorption spectrum of acceptor (**DPOD**) (blue curve).

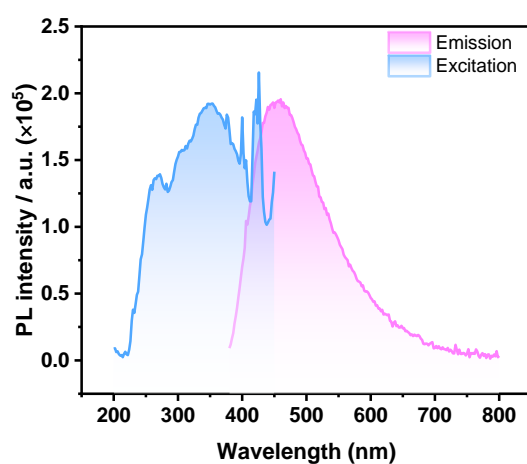

**Figure S10.** The excitation and emission spectra of  $\alpha$ -Cellulose under 340 nm excitation.

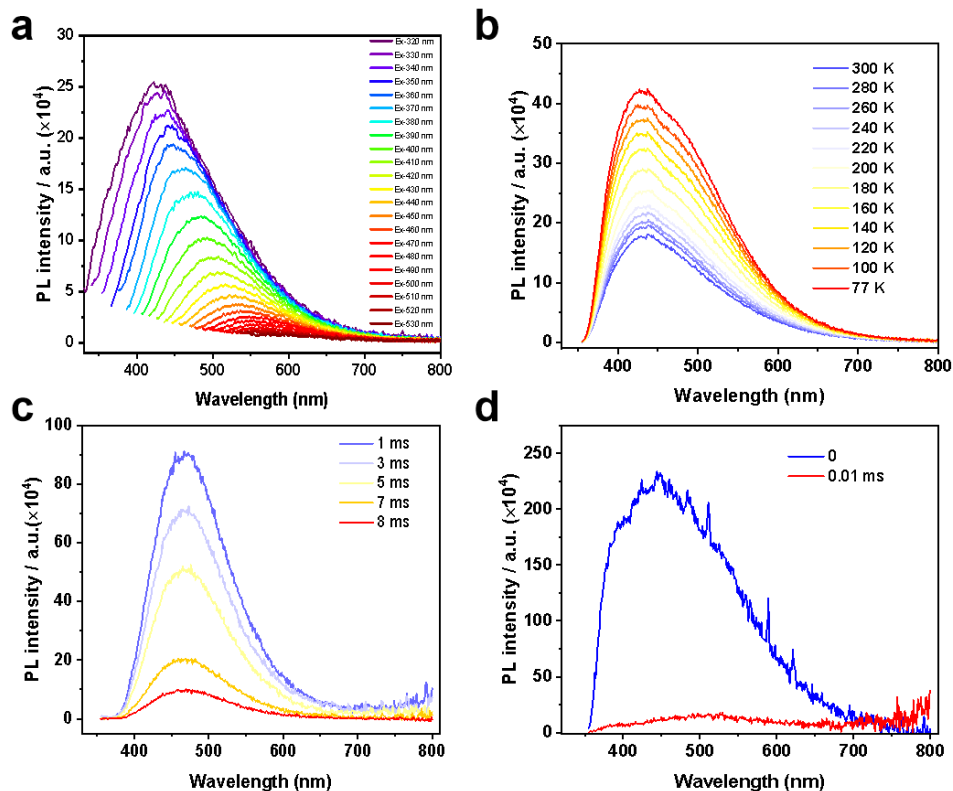

**Figure S11.** (a) The emission spectra of  $\alpha$ -Cellulose under different excitations; (b) Temperature-dependent steady-state PL spectra of  $\alpha$ -Cellulose from 77 K–300 K under 340 nm excitation; PL spectra of  $\alpha$ -Cellulose measured at different time intervals and different temperature of 77 K (c) and 300 K (d) after the removal of 340 nm UV light.

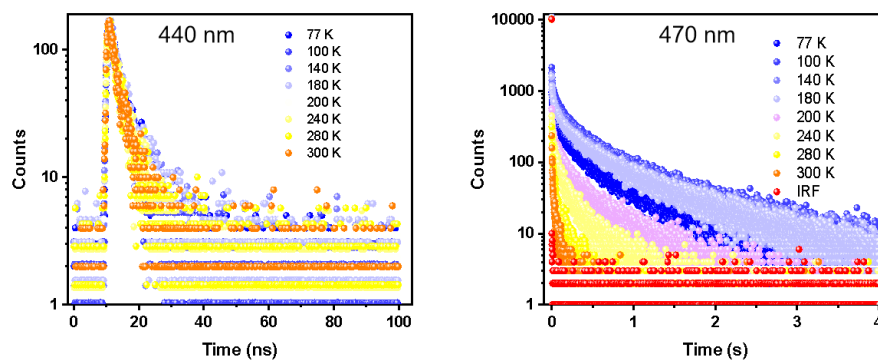

**Figure S12.** Decay curves of  $\alpha$ -Cellulose at 440 nm (a) and at 470 nm (b) from 77 K–300 K (b) under 340 nm excitation.



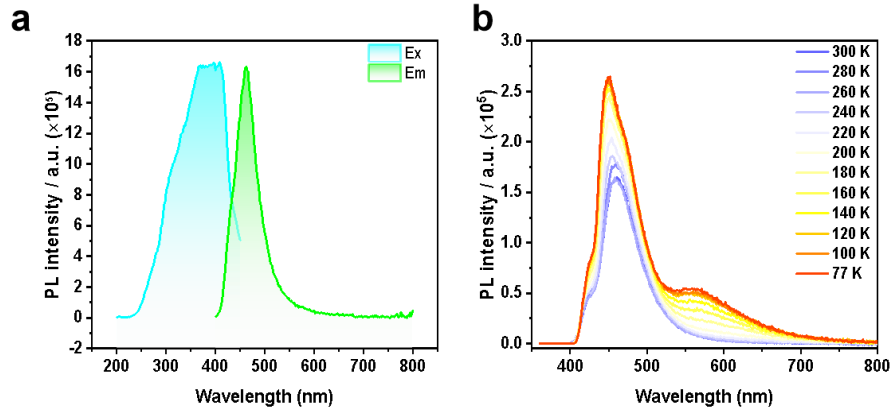

**Figure S13.** (a) The excitation and emission spectra of **DPSD**; (b) Temperature-dependent steady-state PL spectra of **DPSD** from 77 K–300 K.

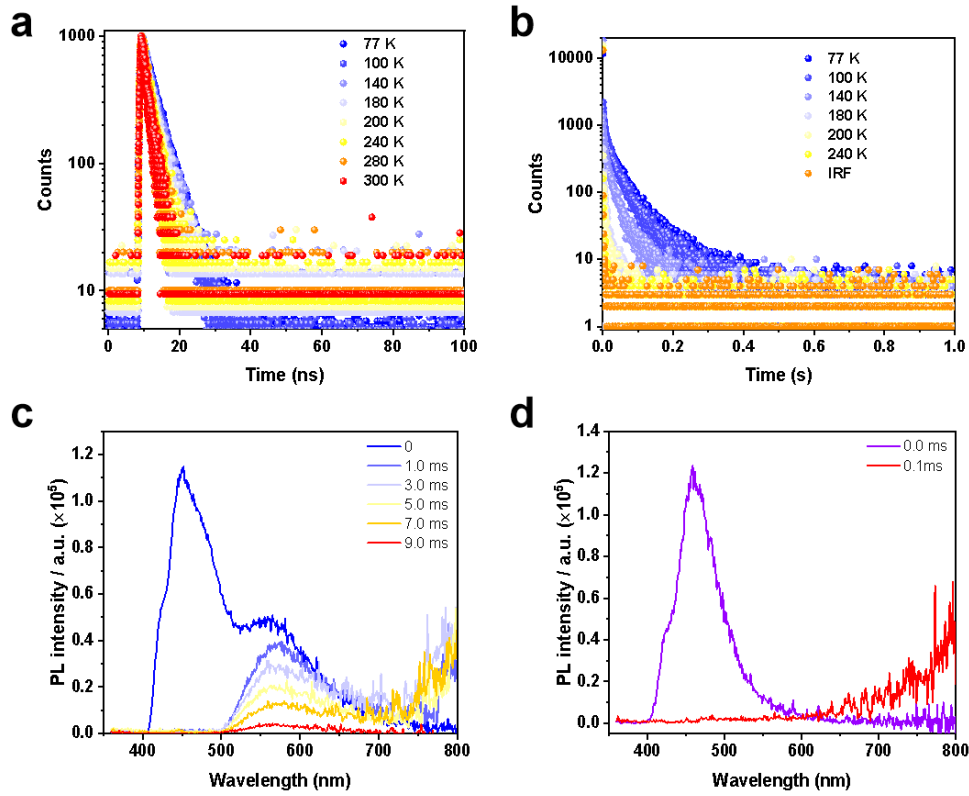

**Figure S14.** Decay curves of **DPSD** at 455 nm from 77 K-300 K (a) and at 570 nm from 77 K-240 K (b); PL spectra of **DPSD** measured at different time intervals and different temperature of 77 K (c) and 300 K (d).

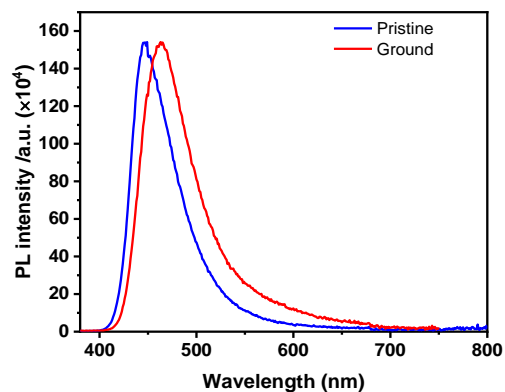

**Figure S15.** Emission spectra of DPSD before and after grinding.

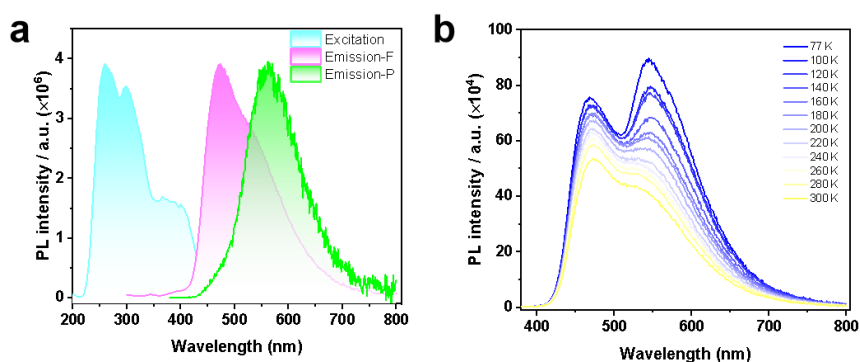

**Figure S16.** (a) The excitation and emission spectra of  $\alpha$ -Cellulose+DPSD (mass ratio=100:1); (b) Temperature-dependent steady-state PL spectra of  $\alpha$ -Cellulose+DPSD from 77 K–300 K.

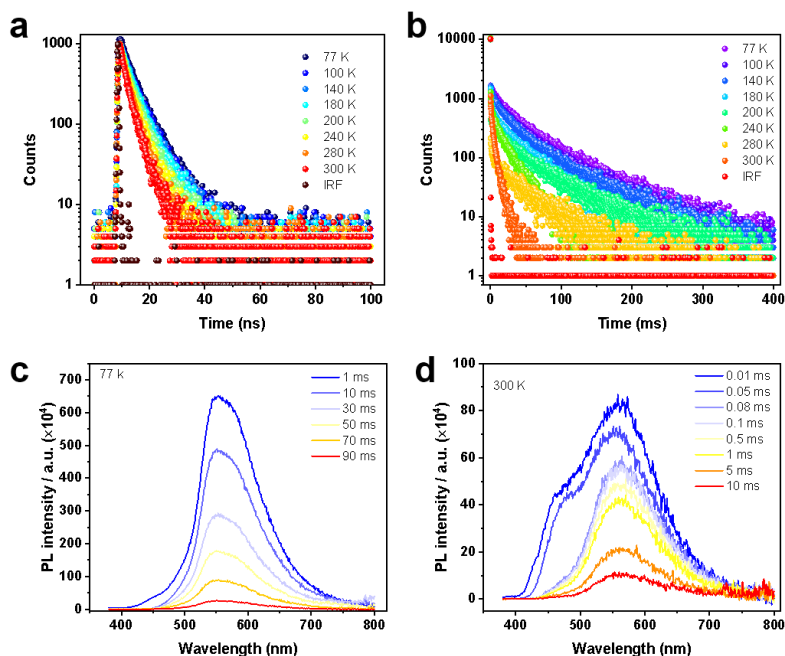

**Figure S17.** Decay curves of  $\alpha$ -Cellulose+DPSD at 470 nm (a) and at 554 nm from 77 K-300 K (b); PL spectra of  $\alpha$ -Cellulose+DPSD measured at different time intervals and

different temperature of 77 K (c) and 300 K (d) after the removal of 340 nm UV light.

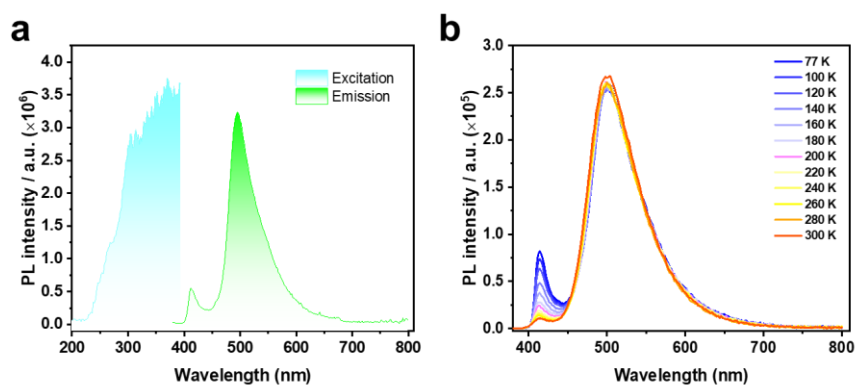

**Figure S18.** (a) The excitation and emission spectra of **DPOD**; (b) Temperature-dependent steady-state PL spectra of **DPOD** from 77 K–300 K.

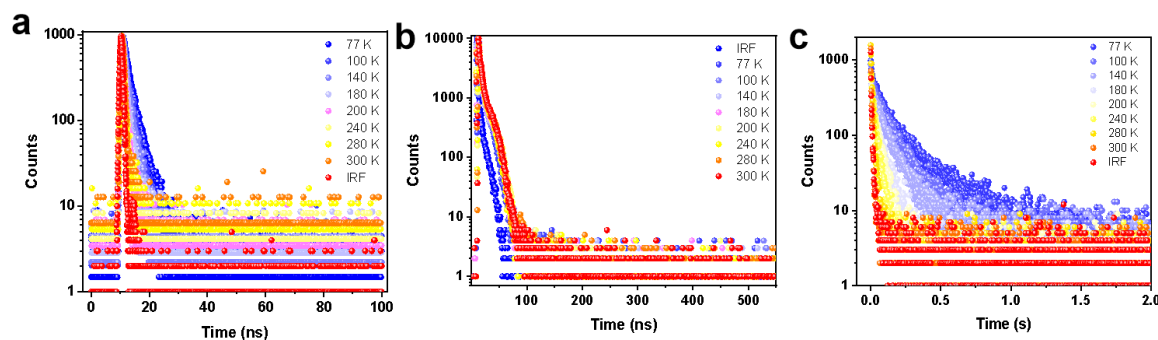

**Figure S19.** Decay curves of **DPOD** at (a) 417 nm, (b) 500 nm, (c) 575 nm from 77 K–300 K.

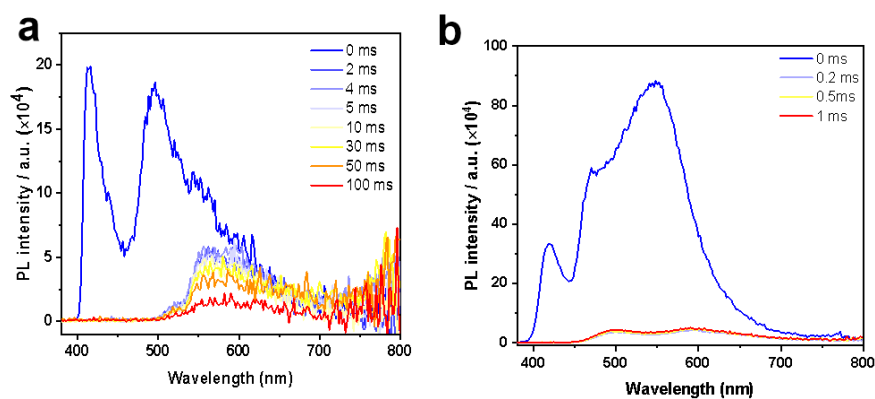

**Figure S20.** PL spectra of **DPOD** measured at different time intervals and different temperature of 77 K (a) and 300 K (b) after the removal of 340 nm UV light.

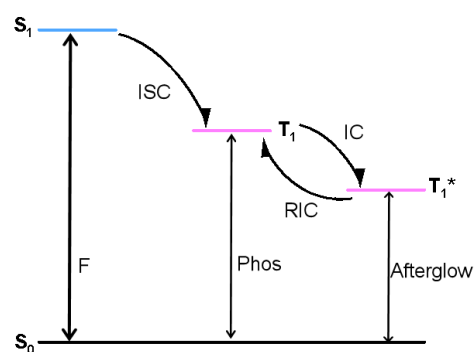

**Figure S21.** Proposed mechanism of photophysical processes based on ISC of **DPOD** (S, singlet; T, triplet; IC, internal conversion; RIC, reverse internal conversion; F, fluorescence; Phos, phosphorescence).

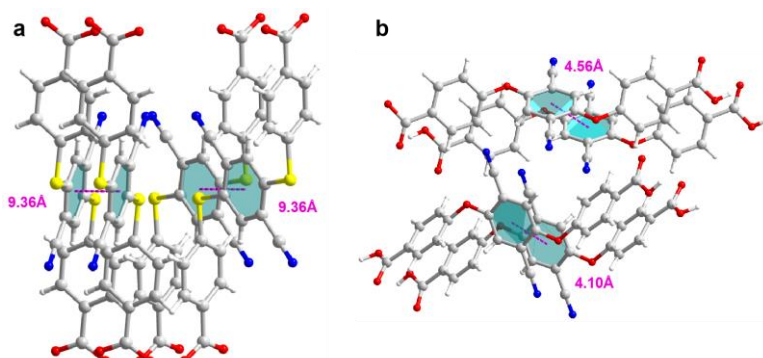

**Figure S22.** Packing among the (a) **DPSD** and (b) **DPOD** crystal by  $\pi \cdots \pi$  interactions.

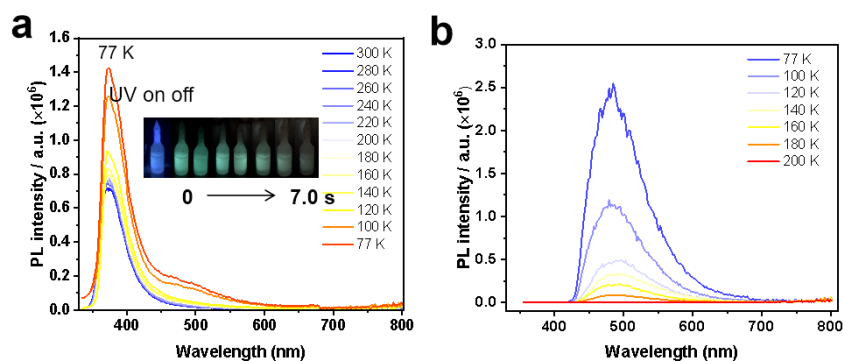

**Figure S23.** (a) Temperature-dependent steady-state prompt PL spectra of **DPOD** from 77 K–300 K and (b) delayed emission spectra from 77 K–200 K in 2-MTHF (50.0  $\mu$ M). The inserts show the photos of **DPOD** in 2-MTHF at 77 K under 365 nm.

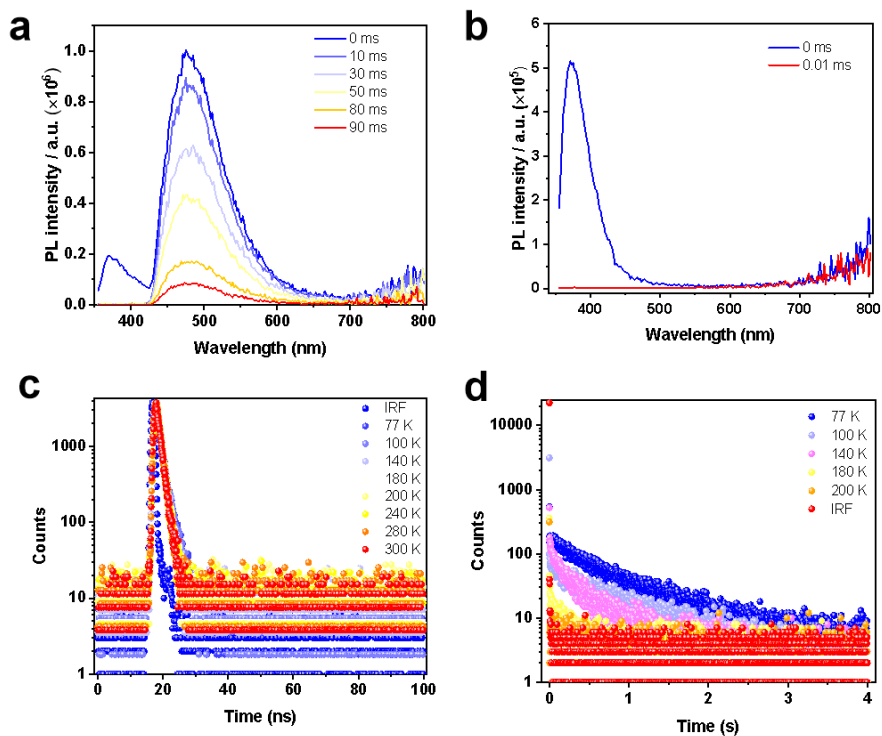

**Figure S24.** PL spectra of **DPOD** in 2-MTHF (50.0  $\mu$ M) measured at different time intervals and different temperature of 77 K (a) and 300 K (b); Decay curves of **DPOD** in 2-MTHF at 375 nm from 77 K-300 K (c) and at 486 nm from 77 K-200 K (d).

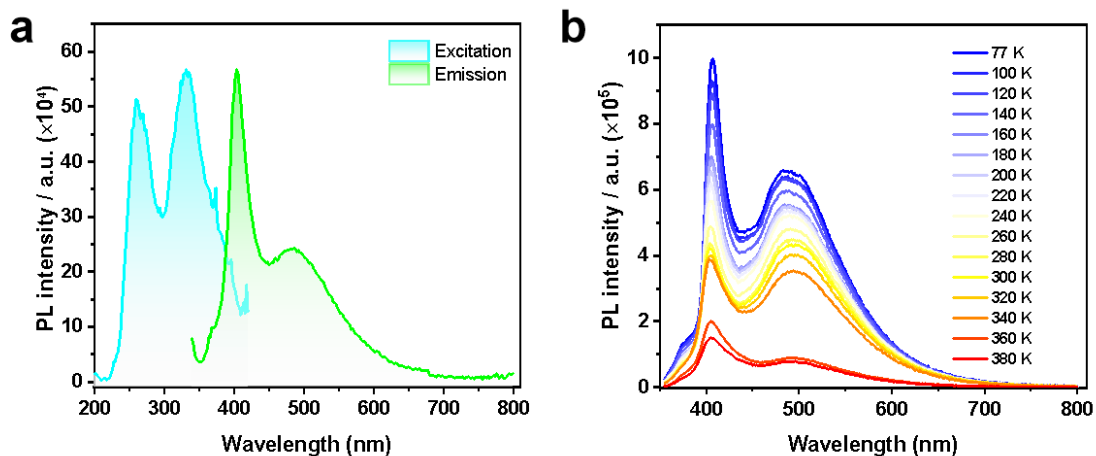

**Figure S25.** (a) The excitation and emission spectra of  $\alpha$ -Cellulose+DPOD (mass ratio=100:1); (b) Temperature-dependent steady-state PL spectra of  $\alpha$ -Cellulose+DPOD from 77 K–380 K.

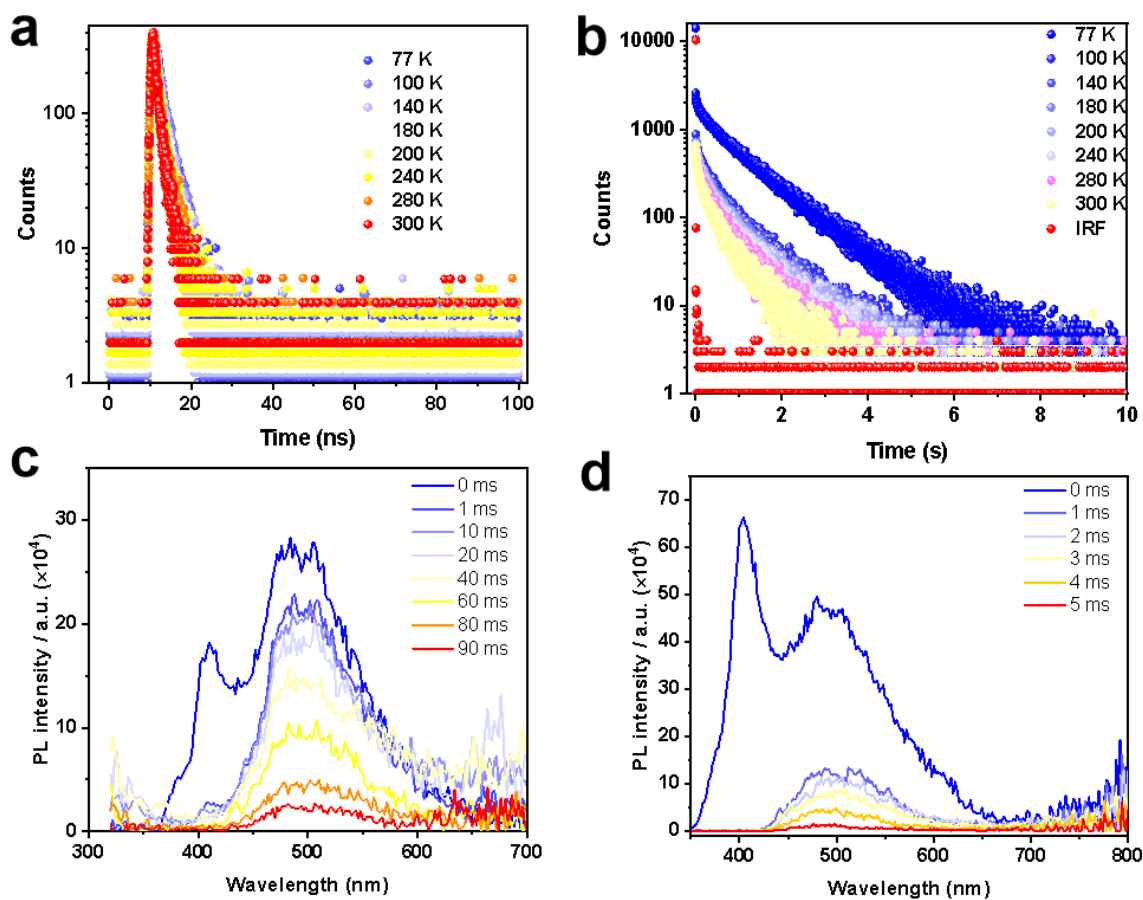

**Figure S26.** Decay curves of  $\alpha$ -Cellulose+DPOD at 417 nm (a) and at 492 nm from 77 K-300 K (b); PL spectra of  $\alpha$ -Cellulose+DPOD measured at different time intervals and different temperature of 77 K (c) and 300 K (d) after the removal of 340 nm UV light.

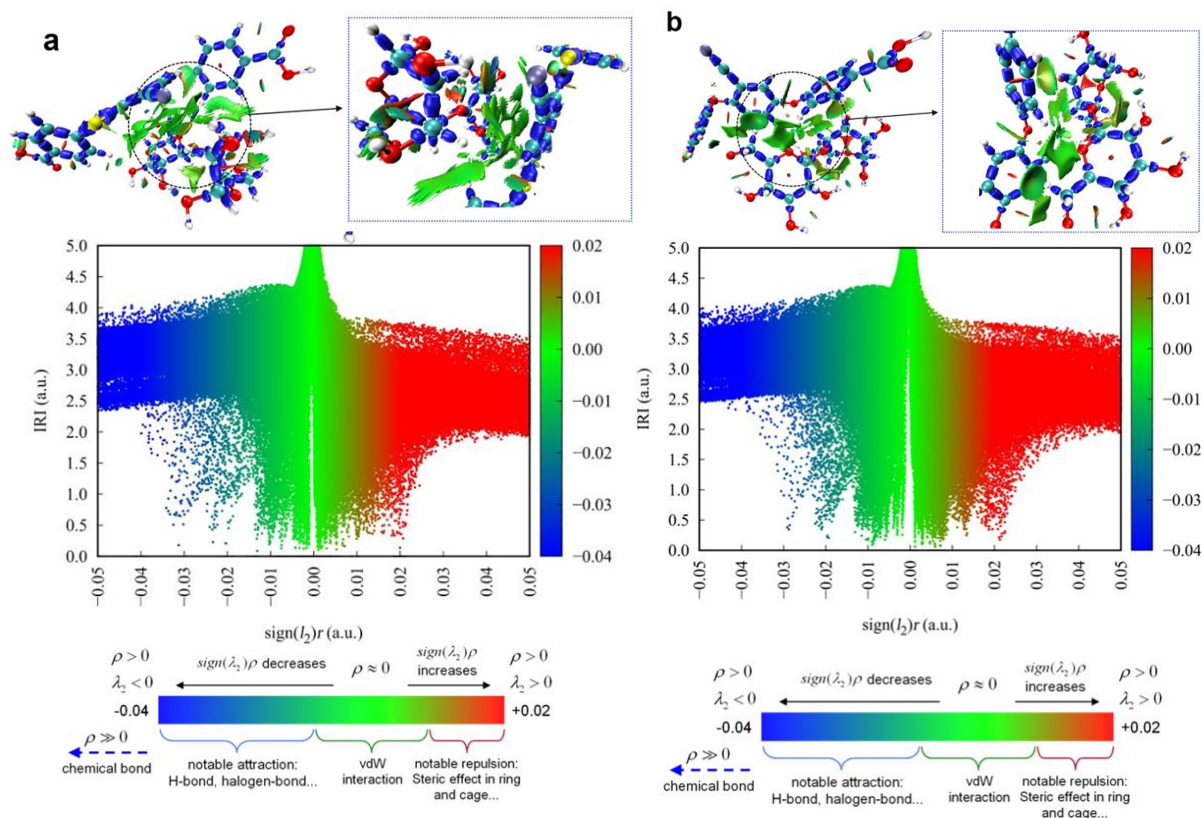

**Figure S27.** The interaction region indicator (IRI) analysis of (a)  $\alpha$ -Cellulose+DPSD, (b)  $\alpha$ -Cellulose+DPOD.

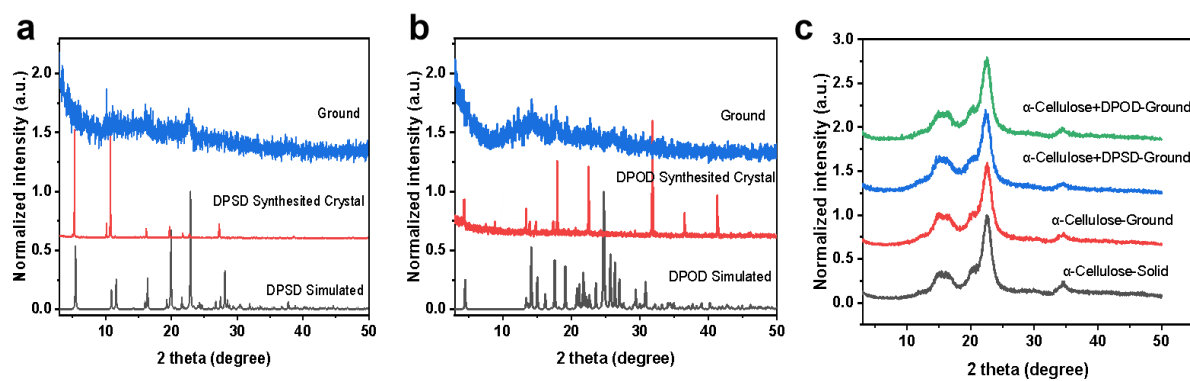

**Figure S28.** (a) PXRD patterns of **DPSD** crystal before and after grinding; (b) PXRD patterns of **DPOD** crystal before and after grinding; (c) PXRD patterns of  $\alpha$ -Cellulose before and after grinding, and host-guest doping systems in ground states.

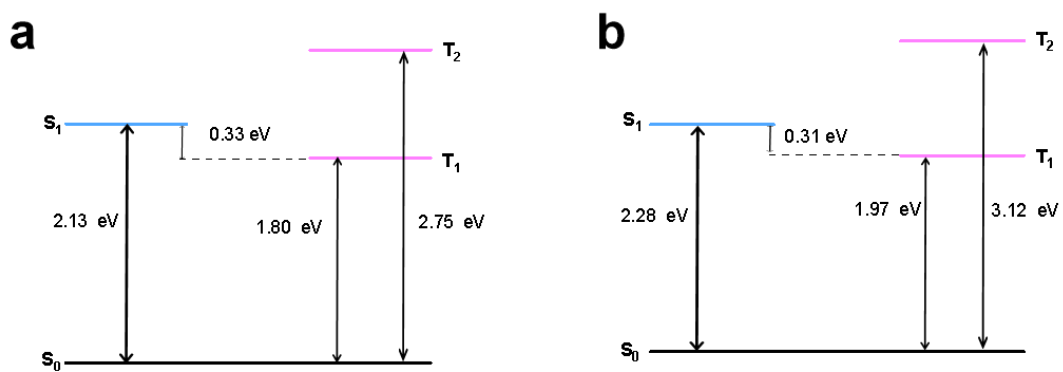

**Figure S29.** Energy level diagram for  $\alpha$ -Cellulose+DPSD and  $\alpha$ -Cellulose+DPOD.

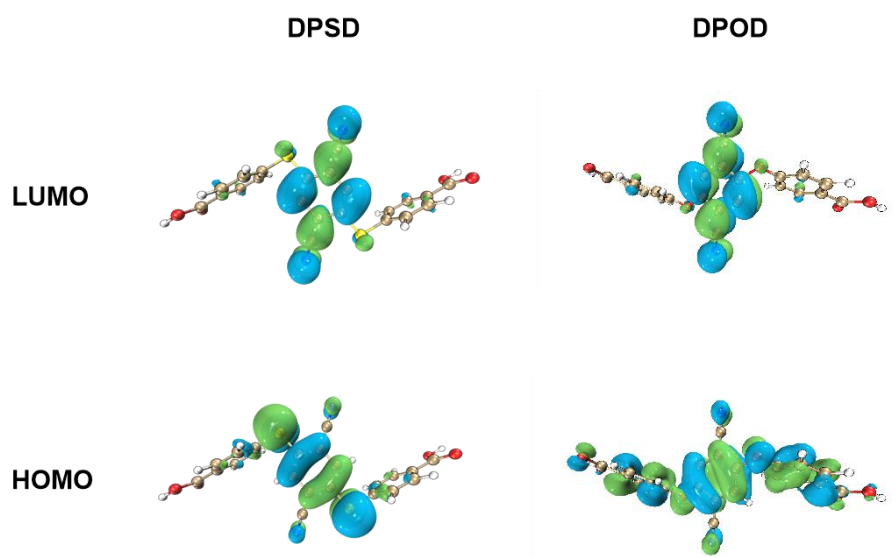

**Figure S30.** The frontier molecular orbitals (FMOs) of DPSD and DPOD.

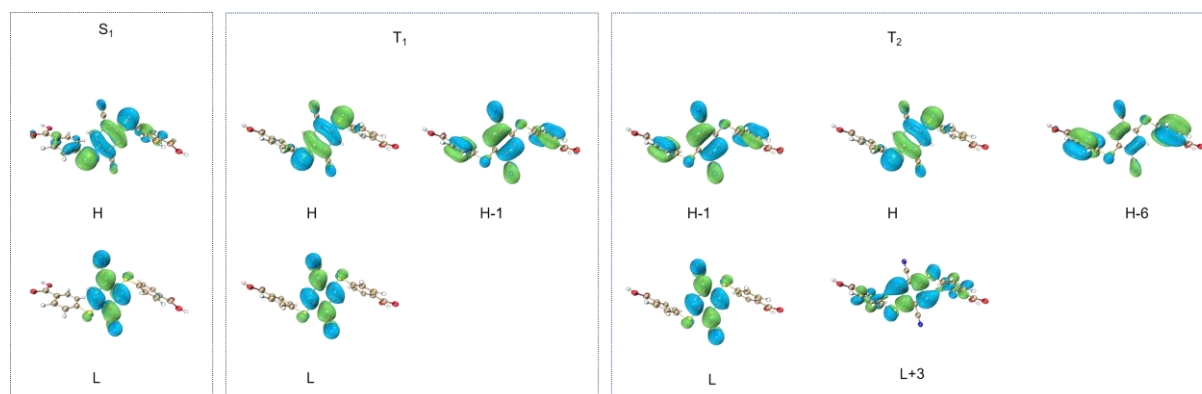

**Figure S31.** The frontier molecular orbitals (FMOs) in  $S_1$ ,  $T_1$  and  $T_2$  for DPSD.



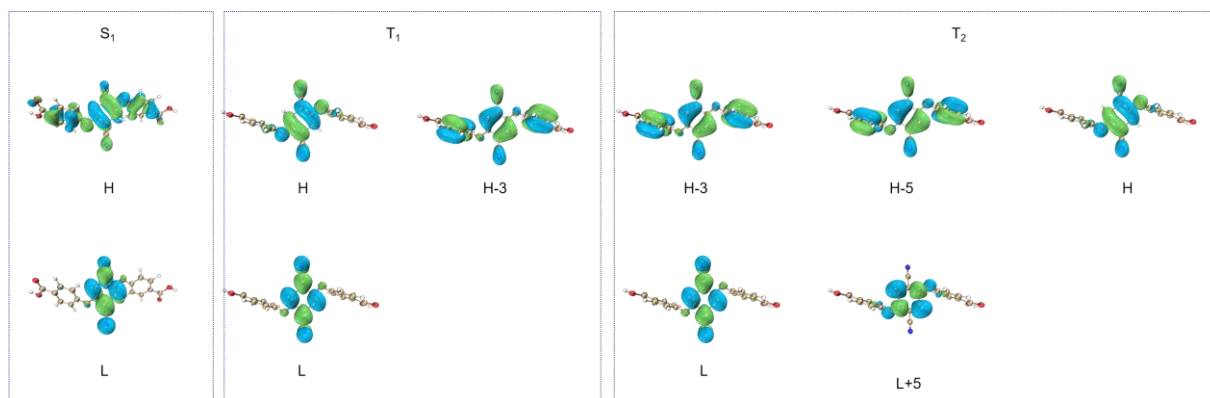

**Figure S32.** The frontier molecular orbitals (FMOs) in  $S_1$ ,  $T_1$  and  $T_2$  for **DPOD**.

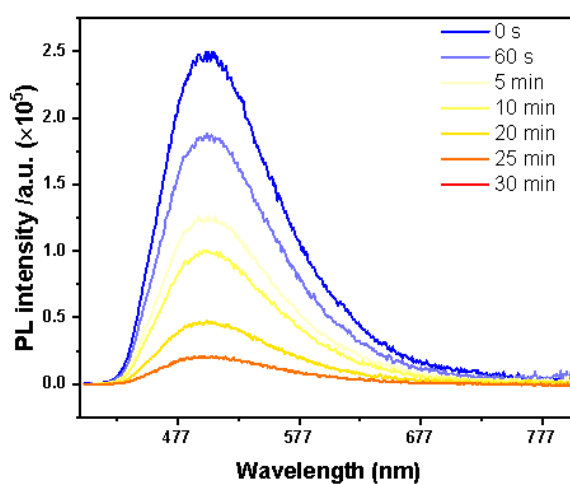

**Figure S33.** The phosphorescence spectra of  **$\alpha$ -Cellulose+DPOD** after water fumigation.

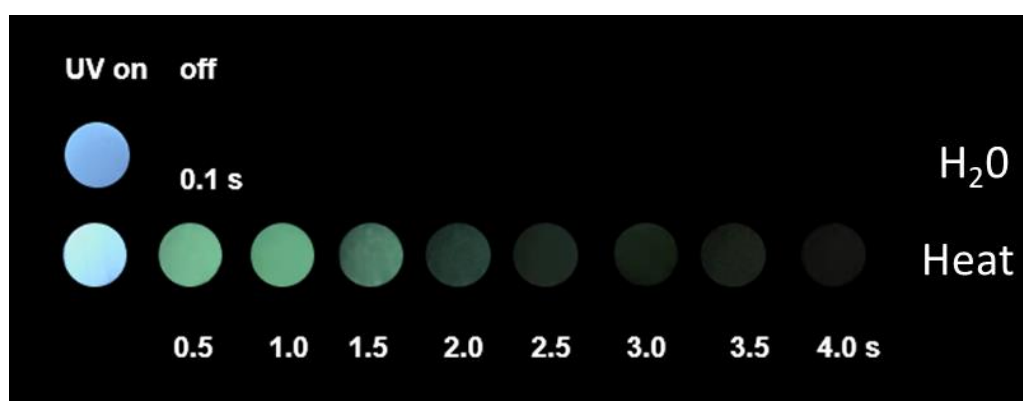

**Figure S34.** Photographs of the water/heat stimulus-responsive property of  **$\alpha$ -Cellulose+DPOD** taken before and after turning off UV-365 nm excitation.

**Table S1.** Crystal data and structure refinement parameters for **DPSD** and **DPOD**.

| Compound                            | DPSD                                                                         | DPOD                                                          |
|-------------------------------------|------------------------------------------------------------------------------|---------------------------------------------------------------|
| Empirical formula                   | C <sub>24</sub> H <sub>15</sub> N <sub>3</sub> O <sub>4</sub> S <sub>2</sub> | C <sub>25</sub> H <sub>18</sub> N <sub>3</sub> O <sub>7</sub> |
| CCDC NO                             | 2312419                                                                      | 2312421                                                       |
| Formula weight                      | 516.58                                                                       | 472.42                                                        |
| Crystal system                      | monoclinic                                                                   | orthorhombic                                                  |
| Space group                         | <i>P2<sub>1</sub>/c</i>                                                      | <i>Pbca</i>                                                   |
| <i>a</i> /Å                         | 16.7130(15)                                                                  | 8.5890(5)                                                     |
| <i>b</i> /Å                         | 8.6188(10)                                                                   | 13.1840(8)                                                    |
| <i>c</i> /Å                         | 9.3560(8)                                                                    | 39.0756(17)                                                   |
| $\alpha$ /°                         | 90                                                                           | 90                                                            |
| $\beta$ /°                          | 103.976(9)                                                                   | 90                                                            |
| $\gamma$ /°                         | 90                                                                           | 90                                                            |
| Volume/Å <sup>3</sup>               | 1307.8(2)                                                                    | 4424.9(4)                                                     |
| <i>Z</i>                            | 2                                                                            | 8                                                             |
| $\rho$ calcg/cm <sup>3</sup>        | 1.312                                                                        | 1.418                                                         |
| $\mu$ /mm <sup>-1</sup>             | 2.171                                                                        | 0.887                                                         |
| F(000)                              | 536.0                                                                        | 1960.0                                                        |
| Radiation                           | CuK $\alpha$ ( $\lambda$ =1.54184)                                           | CuK $\alpha$ ( $\lambda$ =1.54184)                            |
| Data/restraints/parameters          | 1363/4/172                                                                   | 1380/0/147                                                    |
| Goof                                | 1.116                                                                        | 1.028                                                         |
| R <sub>2</sub> [I>>=2 $\sigma$ (I)] | R <sub>1</sub> =0.0471,<br>wR <sub>2</sub> =0.1245                           | R <sub>1</sub> =0.0761,<br>wR <sub>2</sub> =0.1983            |
| wR <sub>2</sub> [all data]          | R <sub>1</sub> =0.0535,<br>wR <sub>2</sub> =0.1310                           | R <sub>1</sub> =0.0965,<br>wR <sub>2</sub> =0.2148            |

**Table S2.** The photophysical parameters of host, guest and host+guest at room temperature.

| Compounds                       | $\alpha$ -Cellulose | DPSD | DPOD    | $\alpha$ -Cellulose+DPSD | $\alpha$ -Cellulose+DPOD |
|---------------------------------|---------------------|------|---------|--------------------------|--------------------------|
| $\Phi$ / %                      | 6.3                 | 7.3  | 66.7    | 7.9                      | 17.6                     |
| $\Phi_F$ / %                    | 2.6                 | 7.3  | 8.5     | 4.4                      | 7.8                      |
| $\Phi_P$ / %                    | 3.7                 | /    | 58.2    | 3.5                      | 9.8                      |
| $\tau_F$ /ns                    | 3.38                | 1.52 | 0.61    | 3.21                     | 1.47                     |
| $\tau_P$ /ms                    | 5.60                | /    | 0.00797 | 11.47                    | 535.21                   |
| $K_{ISC} / 10^7 \text{ s}^{-1}$ | 1.1                 | /    | 95.41   | 1.09                     | 6.67                     |

The photophysical parameters are obtained according to the following equations:<sup>[7]</sup>

$$\tau_{F \text{ or } P} = \tau_1 A_1 + \tau_2 A_2$$

$$K_r^F = \Phi_F / \tau_F$$

$$K_{nr}^F = (1 - \Phi) / \tau_F$$

$$K_r^P = \Phi_P / \tau_P$$

$$K_{nr}^P = (1 - \Phi_P) / \tau_P$$

$$K_{ISC} = (1 - \Phi_F) / \tau_F$$

where  $F$  means fluorescence;  $P$  means phosphorescence;  $r$  means radiative transition;  $nr$  means non-radiative transition;  $ISC$  means intersystem crossing;  $\tau$  means average lifetime;  $K$  means transition rate.

**Table S3.** The decay lifetimes of  $\alpha$ -Cellulose at 440 nm measured at different temperature under the excitation of 340 nm.

| Temperature/K | $\tau_1$ (ns) | $A_1$ (%) | $\tau_2$ (ns) | $A_2$ (%) | $\tau$ (ns) | $\chi^2$ |
|---------------|---------------|-----------|---------------|-----------|-------------|----------|
| 77            | 2.86          | 60.60     | 7.84          | 39.40     | 4.82        | 0.7683   |
| 100           | 2.85          | 60.60     | 7.83          | 39.40     | 4.81        | 0.7683   |
| 140           | 2.60          | 57.56     | 8.27          | 42.44     | 5.01        | 1.0533   |
| 180           | 2.86          | 64.90     | 8.10          | 35.10     | 4.70        | 1.2376   |
| 200           | 2.37          | 60.49     | 6.67          | 39.51     | 4.07        | 0.8029   |
| 240           | 1.71          | 33.74     | 4.62          | 66.26     | 3.64        | 0.8955   |
| 280           | 2.82          | 88.15     | 10.69         | 11.85     | 3.75        | 1.1314   |
| 300           | 1.75          | 47.81     | 4.88          | 52.19     | 3.38        | 1.1454   |

**Table S4.** The decay lifetimes of  **$\alpha$ -Cellulose** at 470 nm measured at different temperature under the excitation of 340 nm.

| Temperature/K | $\tau_1$ (ms) | A <sub>1</sub> (%) | $\tau_2$ (ms) | A <sub>2</sub> (%) | $\tau$ (ms) | $\chi^2$ |
|---------------|---------------|--------------------|---------------|--------------------|-------------|----------|
| 77            | 7.20          | 6.11               | 241.15        | 93.89              | 226.86      | 1.2835   |
| 100           | 22.92         | 11.79              | 245.21        | 88.21              | 219.00      | 1.2279   |
| 140           | 10.0          | 6.59               | 228.58        | 93.41              | 214.18      | 1.2672   |
| 180           | 11.76         | 7.47               | 227.98        | 92.53              | 211.83      | 1.2887   |
| 200           | 6.14          | 6.45               | 149.95        | 93.55              | 140.67      | 1.2392   |
| 240           | 13.07         | 21.08              | 128.56        | 78.92              | 104.21      | 0.7082   |
| 280           | 1.46          | 9.67               | 40.10         | 90.33              | 36.36       | 1.3306   |
| 300           | 0.49          | 25.60              | 7.37          | 74.40              | 5.60        | 1.0567   |

**Table S5.** The decay lifetimes of **DPSD** at 455 nm measured at different temperature.

| Temperature/K | $\tau_1$ (ns) | A(%) | $\chi^2$ |
|---------------|---------------|------|----------|
| 77            | 4.01          | 100  | 1.3303   |
| 100           | 3.81          | 100  | 1.2810   |
| 140           | 3.04          | 100  | 0.3674   |
| 180           | 2.74          | 100  | 0.3305   |
| 200           | 2.37          | 100  | 0.3011   |
| 240           | 2.18          | 100  | 0.2623   |
| 280           | 1.91          | 100  | 0.2243   |
| 300           | 1.52          | 100  | 0.5810   |

**Table S6.** The decay lifetimes of **DPSD** at 570 nm measured at different temperature.

| Temperature/K | $\tau_1$ (ms) | A <sub>1</sub> (%) | $\tau_2$ (ms) | A <sub>2</sub> (%) | $\tau$ (ms) | $\chi^2$ |
|---------------|---------------|--------------------|---------------|--------------------|-------------|----------|
| 77            | 13.27         | 30.89              | 65.16         | 69.11              | 49.13       | 1.2318   |
| 100           | 10.03         | 38.11              | 54.40         | 61.89              | 37.49       | 1.4399   |
| 140           | 5.82          | 35.35              | 37.34         | 64.65              | 26.20       | 1.1690   |
| 180           | 2.97          | 50.78              | 22.39         | 49.22              | 12.53       | 0.8494   |
| 200           | 2.03          | 50.86              | 17.46         | 49.14              | 9.61        | 0.7568   |
| 240           | 2.00          |                    |               |                    | 2.00        | 0.7412   |

**Table S7.** Calculated FRET efficiencies according to the changed fluorescence lifetimes of donor ( **$\alpha$ -Cellulose**).

| Samples                                                        | Ground time (s) | Lifetimes, $\tau_{\alpha\text{-Cellulose}}$ (ns, $e_x=340$ nm, $e_m=440$ nm) | Efficiencies, $E_{\text{FRET}}$ (%) |
|----------------------------------------------------------------|-----------------|------------------------------------------------------------------------------|-------------------------------------|
| <b><math>\alpha</math>-Cellulose</b>                           | /               | 3.93                                                                         | /                                   |
|                                                                | 5               | 2.40                                                                         | 38.93                               |
| The mixed sample ( <b><math>\alpha</math>-Cellulose+DPSD</b> ) | 15              | 2.06                                                                         | 47.58                               |
|                                                                | 25              | 1.89                                                                         | 51.91                               |
|                                                                | 35              | 1.85                                                                         | 52.93                               |

| Samples                                                        | Ground time (s) | Lifetimes, $\tau_{\alpha\text{-Cellulose}}$ (ns, $e_x=340$ nm, $e_m=440$ nm) | Efficiencies, $E_{\text{FRET}}$ (%) |
|----------------------------------------------------------------|-----------------|------------------------------------------------------------------------------|-------------------------------------|
| <b><math>\alpha</math>-Cellulose</b>                           | /               | 3.93                                                                         | /                                   |
|                                                                | 5               | 3.10                                                                         | 21.12                               |
| The mixed sample ( <b><math>\alpha</math>-Cellulose+DPOD</b> ) | 15              | 2.60                                                                         | 33.84                               |
|                                                                | 25              | 2.45                                                                         | 37.66                               |
|                                                                | 35              | 2.41                                                                         | 38.68                               |
|                                                                | 45              | 2.36                                                                         | 39.95                               |

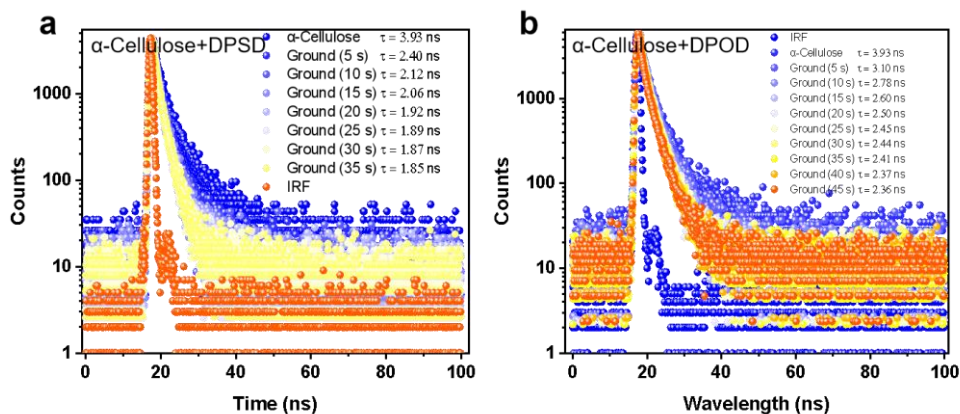

The energy transfer efficiencies can be calculated according to the fluorescence lifetimes of donor in the presence and in the absence of acceptor. The FRET efficiency may be estimated based on the equation:<sup>[8-10]</sup>

$$E_{\text{FRET}} = 1 - \tau_{\text{DA}} / \tau_{\text{D}}$$

Where  $\tau_{\text{DA}}$  and  $\tau_{\text{D}}$  represent the fluorescence lifetimes of donor in the presence and in the absence of the acceptor, respectively.

**Table S8.** The decay lifetimes of  **$\alpha$ -Cellulose+DPSD** at 470 nm measured at different temperature under the excitation of 340 nm.

| Temperature/K | $\tau_1$ (ns) | $A_1$ (%) | $\tau_2$ (ns) | $A_2$ (%) | $\tau$ (ns) | $\chi^2$ |
|---------------|---------------|-----------|---------------|-----------|-------------|----------|
| 77            | 3.12          | 35.75     | 6.85          | 64.25     | 5.52        | 0.9997   |
| 100           | 3.32          | 42.50     | 7.06          | 57.50     | 5.47        | 1.0383   |
| 140           | 2.84          | 30.73     | 6.24          | 69.27     | 5.20        | 1.0597   |
| 180           | 2.96          | 39.59     | 6.31          | 60.41     | 4.98        | 1.0009   |
| 200           | 2.66          | 39.77     | 5.88          | 60.23     | 4.60        | 0.8611   |
| 240           | 1.93          | 27.87     | 4.89          | 72.13     | 4.07        | 0.8923   |
| 280           | 2.05          | 41.49     | 4.52          | 58.51     | 3.50        | 0.9960   |
| 300           | 1.85          | 48.91     | 4.51          | 51.09     | 3.21        | 0.8797   |

**Table S9.** The decay lifetimes of  **$\alpha$ -Cellulose+DPSD** at 554 nm measured at different temperature under the excitation of 340 nm.

| Temperature/K | $\tau_1$ (ms) | A <sub>1</sub> (%) | $\tau_2$ (ms) | A <sub>2</sub> (%) | $\tau$ (ms) | $\chi^2$ |
|---------------|---------------|--------------------|---------------|--------------------|-------------|----------|
| 77            | 16.84         | 23.98              | 62.90         | 76.02              | 51.85       | 1.0193   |
| 100           | 16.77         | 26.10              | 64.01         | 73.90              | 51.68       | 1.2117   |
| 140           | 15.05         | 28.32              | 59.89         | 71.68              | 47.19       | 1.3089   |
| 180           | 13.92         | 30.47              | 59.87         | 69.53              | 45.87       | 1.2882   |
| 200           | 3.99          | 9.04               | 46.02         | 90.96              | 42.22       | 0.8864   |
| 240           | 5.49          | 23.33              | 25.25         | 76.56              | 20.61       | 0.8222   |
| 280           | 6.24          | 26.49              | 25.95         | 73.51              | 20.73       | 0.8221   |
| 300           | 2.00          | 42.52              | 18.48         | 57.48              | 11.47       | 0.8091   |

**Table S10.** The decay lifetimes of **DPOD** at 417 nm measured at different temperature.

| Temperature/K | $\tau_1$ (ns) | A(%) | $\chi^2$ |
|---------------|---------------|------|----------|
| 77            | 2.39          | 100  | 0.7053   |
| 100           | 1.76          | 100  | 0.5825   |
| 140           | 1.58          | 100  | 0.5029   |
| 180           | 1.08          | 100  | 0.3816   |
| 200           | 0.85          | 100  | 0.3354   |
| 240           | 0.71          | 100  | 0.2736   |
| 280           | 0.69          | 100  | 0.2779   |
| 300           | 0.61          | 100  | 0.2416   |

**Table S11.** The decay lifetimes of **DPOD** at 500 nm measured at different temperature.

| Temperature/K | $\tau_1(\mu\text{s})$ | $A_1(\%)$ | $\tau_2(\mu\text{s})$ | $A_2(\%)$ | $\tau(\mu\text{s})$ | $\chi^2$ |
|---------------|-----------------------|-----------|-----------------------|-----------|---------------------|----------|
| 77            | 2.35                  | 26.99     | 11.84                 | 73.01     | 9.28                | 0.7767   |
| 100           | 2.32                  | 26.49     | 11.73                 | 73.51     | 9.24                | 0.7068   |
| 140           | 2.28                  | 33.40     | 12.52                 | 66.60     | 9.10                | 0.7331   |
| 180           | 2.17                  | 34.65     | 12.57                 | 65.35     | 8.97                | 0.5702   |
| 200           | 2.19                  | 34.91     | 12.57                 | 65.09     | 8.95                | 0.6369   |
| 240           | 2.16                  | 31.63     | 11.85                 | 68.37     | 8.79                | 0.6518   |
| 280           | 2.07                  | 28.91     | 11.18                 | 71.09     | 8.55                | 0.5754   |
| 300           | 1.82                  | 28.04     | 10.36                 | 71.96     | 7.97                | 0.5850   |

**Table S12.** The decay lifetimes of **DPOD** at 575 nm measured at different temperature.

| Temperature/K | $\tau_1(\text{ms})$ | $A_1(\%)$ | $\tau_2(\text{ms})$ | $A_2(\%)$ | $\tau(\text{ms})$ | $\chi^2$ |
|---------------|---------------------|-----------|---------------------|-----------|-------------------|----------|
| 77            | 59.61               | 37.45     | 260.10              | 62.55     | 185.02            | 1.499    |
| 100           | 26.03               | 16.06     | 138.20              | 83.94     | 120.19            | 1.453    |
| 140           | 41.83               | 37.24     | 140.28              | 62.76     | 103.62            | 1.311    |
| 180           | 5.40                | 13.82     | 65.33               | 86.18     | 57.05             | 0.986    |
| 200           | 7.77                | 15.90     | 49.24               | 84.10     | 42.65             | 0.907    |
| 240           | 13.86               | 45.85     | 39.50               | 54.15     | 27.74             | 0.911    |
| 280           | 6.72                | 66.36     | 20.55               | 33.64     | 11.37             | 0.951    |
| 300           | 3.12                | 79.76     | 17.16               | 20.24     | 5.96              | 1.047    |



**Table S13.** The decay lifetimes of **DPOD** in 2-MTHF (50.0  $\mu\text{M}$ ) at 375 nm measured at different temperature.

| Temperature/K | $\tau_1(\text{ns})$ | A(%) | $\chi^2$ |
|---------------|---------------------|------|----------|
| 77            | 1.52                | 100  | 0.849    |
| 100           | 1.49                | 100  | 0.636    |
| 140           | 1.34                | 100  | 0.574    |
| 180           | 1.21                | 100  | 0.967    |
| 200           | 1.20                | 100  | 0.945    |
| 240           | 1.21                | 100  | 0.675    |
| 280           | 1.20                | 100  | 0.684    |
| 300           | 1.19                | 100  | 0.770    |

**Table S14.** The decay lifetimes of **DPOD** in 2-MTHF (50.0  $\mu\text{M}$ ) at 486 nm measured at different temperature.

| Temperature/K | $\tau_1(\text{ms})$ | $A_1(\%)$ | $\tau_2(\text{ms})$ | $A_2(\%)$ | $\tau(\text{ms})$ | $\chi^2$ |
|---------------|---------------------|-----------|---------------------|-----------|-------------------|----------|
| 77            | 238.53              | 16.62     | 849.84              | 83.38     | 748.24            | 1.246    |
| 100           | 39.73               | 3.0       | 780.42              | 97.0      | 758.20            | 1.059    |
| 140           | 176.60              | 11.52     | 69.34               | 88.48     | 81.69             | 1.219    |
| 180           | 20.28               | 14.98     | 48.40               | 85.02     | 44.18             | 1.019    |
| 200           | 0.002               | 100       |                     |           | 0.002             | 1.112    |

**Table S15.** The decay lifetimes of  $\alpha$ -Cellulose+DPOD at 417 nm measured at different temperature under the excitation of 340 nm.

| Temperature/K | $\tau_1$ (ns) | A(%) | $\chi^2$ |
|---------------|---------------|------|----------|
| 77            | 2.38          | 100  | 0.5685   |
| 100           | 2.31          | 100  | 0.5468   |
| 140           | 2.09          | 100  | 0.5534   |
| 180           | 1.96          | 100  | 0.5207   |
| 200           | 1.83          | 100  | 0.4867   |
| 240           | 1.71          | 100  | 0.4227   |
| 280           | 1.55          | 100  | 0.4296   |
| 300           | 1.47          | 100  | 0.3505   |

**Table S16.** The decay lifetimes of  $\alpha$ -Cellulose+DPOD at 492 nm measured at different temperature under the excitation of 340 nm.

| Temperature/K | $\tau_1$ (ms) | A <sub>1</sub> (%) | $\tau_2$ (ms) | A <sub>2</sub> (%) | $\tau$ (ms) | $\chi^2$ |
|---------------|---------------|--------------------|---------------|--------------------|-------------|----------|
| 77            | 254.67        | 11.42              | 1142.61       | 88.58              | 1041.21     | 1.1761   |
| 100           | 225.43        | 23.21              | 918.95        | 76.79              | 757.98      | 1.1233   |
| 140           | 179.76        | 19.94              | 822.02        | 80.06              | 693.95      | 1.2773   |
| 180           | 201.83        | 22.46              | 815.05        | 77.54              | 677.32      | 1.1168   |
| 200           | 184.14        | 21.81              | 802.53        | 78.19              | 667.66      | 1.1530   |
| 240           | 161.88        | 19.59              | 736.97        | 80.41              | 624.31      | 1.0373   |
| 280           | 153.07        | 19.26              | 696.68        | 80.74              | 591.98      | 0.7432   |
| 300           | 146.49        | 21.96              | 644.59        | 78.04              | 535.21      | 0.8549   |

**Table S17.** TD-DFT calculated energy levels of  $\alpha$ -Cellulose+DPSD.

| State          | Energy(eV) | Transition configuration                                                  |
|----------------|------------|---------------------------------------------------------------------------|
| S <sub>1</sub> | 2.13       | H→L(99.3%)                                                                |
| T <sub>1</sub> | 1.80       | H→L(91.4%)                                                                |
| T <sub>2</sub> | 2.75       | H-1→L(94.6%)                                                              |
| T <sub>3</sub> | 2.84       | H-16→L(46.1%)<br>H-18→L(10.5%)<br>H-9→L(7.1%)<br>H→L(6.6%)<br>H→L+3(6.1%) |
| T <sub>4</sub> | 3.08       | H-4→L(81.4%)<br>H-5→L+1(5.8%)                                             |
| T <sub>5</sub> | 3.16       | H→L+1(45.2%)<br>H-4→L+1(9.2%)<br>H-4→L+2(6.5%)                            |

**Table S18.** TD-DFT calculated energy levels of  $\alpha$ -Cellulose+DPOD.

| State          | Energy(eV) | Transition configuration                     |
|----------------|------------|----------------------------------------------|
| S <sub>1</sub> | 2.28       | H-1→L(75.2%)<br>H-2→L(24.4%)                 |
| T <sub>1</sub> | 1.97       | H→L+1(81.7%)<br>H-1→L(9.2%)                  |
| T <sub>2</sub> | 3.12       | H-1→L(52.6%)<br>H→L(16.8%)<br>H-16→L(15.5%)  |
| T <sub>3</sub> | 3.17       | H-1→L(36.2%)<br>H-16→L(35.7%)<br>H-6→L(5.2%) |

|                |      |                                                                 |
|----------------|------|-----------------------------------------------------------------|
| T <sub>4</sub> | 3.49 | H-2→L(41.5%)<br>H-6→L+2(24.3%)<br>H→L+2(10.6%)<br>H-7→L+5(6.2%) |
| T <sub>5</sub> | 3.50 | H-2→L(50.7%)<br>H-6→L+2(19.5%)<br>H→L+2(9.8%)                   |

**Table S19.** TD-DFT calculated energy levels of **DPSD**.

| State          | Energy(eV) | Transition configuration                                                              |
|----------------|------------|---------------------------------------------------------------------------------------|
| S <sub>1</sub> | 3.29       | H→L(95.6%)                                                                            |
| T <sub>1</sub> | 1.85       | H→L (82.2%)<br>H-1→L (11.1%)                                                          |
| T <sub>2</sub> | 3.24       | H-1→L(48.4%)<br>H→L(16.8%)<br>H→L+3(11.0%)<br>H-6→L(10.5%)                            |
| T <sub>3</sub> | 3.36       | H-4→L+1(32.1%)<br>H-3→L+2(27.2%)<br>H-5→L+5(10.6%)<br>H-6→L+4(10.6%)<br>H-2→L+2(6.4%) |
| T <sub>4</sub> | 3.36       | H-4→L+2(31.4%)<br>H-3→L+1(27.7%)<br>H-5→L+4(12.8%)<br>H-6→L+5(8.5%)<br>H-2→L+1(6.5%)  |
| T <sub>5</sub> | 3.75       | H→L+3(65.4%)<br>H-1→L(15.7%)<br>H→L+5(9.7%)                                           |
| T <sub>6</sub> | 4.16       | H→L+1(59.8%)<br>H-2→L+2(10.5%)<br>H-5→L+2(7.2%)<br>H-6→L+1(6.7%)                      |
|                | 4.21       | H→L+2(36.7%)                                                                          |

|                 |      |                                                                     |
|-----------------|------|---------------------------------------------------------------------|
| T <sub>7</sub>  |      | H-5→L+1(19.2%)<br>H-6→L+2(16.1%)<br>H-2→L+1(11.6%)<br>H-1→L+2(8.6%) |
| T <sub>8</sub>  | 4.25 | H-2→L(63.9%)<br>H-3→L(14.1%)<br>H-14→L(6.2%)                        |
| T <sub>9</sub>  | 4.31 | H-5→L+2(36.1%)<br>H-6→L+1(29.3%)<br>H→L+1(18.0%)<br>H-1→L+1(7.5%)   |
| T <sub>10</sub> | 4.35 | H→L+2(40.5%)<br>H-5→L+1(25.7%)<br>H-6→L+2(18.9%)                    |

**Table S20.** SOC constants( $\xi$ ) between singlet and triplet states of **DPSD**.

| Energy levels  | SOC constants         |
|----------------|-----------------------|
| $\xi(S_1-T_1)$ | 0.47 cm <sup>-1</sup> |
| $\xi(S_1-T_2)$ | 0.10 cm <sup>-1</sup> |
| $\xi(S_1-T_3)$ | 0 cm <sup>-1</sup>    |
| $\xi(S_1-T_4)$ | 0.95 cm <sup>-1</sup> |
| $\xi(T_1-S_0)$ | 0 cm <sup>-1</sup>    |

**Table S21.** TD-DFT calculated energy levels of **DPOD**.

| State          | Energy(eV) | Transition configuration                                                             |
|----------------|------------|--------------------------------------------------------------------------------------|
| S <sub>1</sub> | 3.69       | H→L(91.4%)                                                                           |
| T <sub>1</sub> | 1.83       | H→L(91.8%)<br>H-3→L(5.2%)                                                            |
| T <sub>2</sub> | 3.35       | H-3→L(38.3%)<br>H-5→L(35.8%)<br>H→L(9.9%)<br>H→L+5(6.8%)                             |
| T <sub>3</sub> | 3.43       | H-1→L+2(33.0%)<br>H-2→L+1(32.7%)<br>H-4→L+4(14.7%)<br>H-3→L+3(8.7%)<br>H-5→L+3(6.4%) |

|                 |      |                                                                                        |
|-----------------|------|----------------------------------------------------------------------------------------|
| T <sub>4</sub>  | 3.43 | H-1→L+1(32.7%)<br>H-2→L+2(31.5%)<br>H-4→L+3(14.8%)<br>H-3→L+4(8.4%)<br>H-5→L+4(5.7%)   |
| T <sub>5</sub>  | 4.18 | H→L+5(78.6%)<br>H-3→L(6.3%)<br>H-5→L(5.6%)                                             |
| T <sub>6</sub>  | 4.54 | H-4→L+2(40.9%)<br>H-3→L+1(24.8%)<br>H-5→L+1(15.8%)                                     |
| T <sub>7</sub>  | 4.54 | H-4→L+1(41.8%)<br>H-3→L+2(24.3%)<br>H-5→L+2(15.6%)                                     |
| T <sub>8</sub>  | 4.64 | H-4→L+4(28.4%)<br>H-3→L+3(17.1%)<br>H-1→L+2(14.0%)<br>H-2→L+1(13.6%)<br>H-5→L+3(12.2%) |
| T <sub>9</sub>  | 4.64 | H-4→L+3(31.1%)<br>H-3→L+4(16.9%)<br>H-1→L+1(14.5%)<br>H-2→L+2(13.8%)<br>H-5→L+4(12.0%) |
| T <sub>10</sub> | 4.70 | H-8→L(62.8%)<br>H→L+10(10.3%)<br>H-13→L(5.8%)                                          |

**Table S22.** SOC constants( $\xi$ ) between singlet and triplet states of **DPOD**.

| Energy levels  | SOC constants         |
|----------------|-----------------------|
| $\xi(S_1-T_1)$ | 4.32 cm <sup>-1</sup> |
| $\xi(S_1-T_2)$ | 0.41 cm <sup>-1</sup> |
| $\xi(S_1-T_3)$ | 0.26 cm <sup>-1</sup> |
| $\xi(S_1-T_4)$ | 0.91 cm <sup>-1</sup> |
| $\xi(T_1-S_0)$ | 0.02 cm <sup>-1</sup> |

## REFERENCES

- [1] Dolomanov, O. V.; Bourhis, L. J.; Gildea, R. J.; Howard, J. A. K.; Puschmann, H. OLEX2: a complete structure solution, refinement and analysis program. *J. Appl. Crystallogr.* **2009**, *42*, 339-341.
- [2] Frisch, M. J.; Trucks, G. W.; Schlegel, H. B.; Scuseria, G. E.; Robb, M. A.; Cheeseman, J. R.; Scalmani, G.; Barone, V.; Mennucci, B.; Petersson, G. A.; Nakatsuji, H.; Caricato, M.; Li, X.; Hratchian, H. P.; Izmaylov, A. F.; Bloino, J.; Zheng, G.; Sonnenberg, J. L.; Hada, M.; Ehara, M.; Toyota, K.; Fukuda, R.; Hasegawa, J.; Ishida, M.; Nakajima, T.; Honda, Y.; Kitao, O.; Nakai, H.; Vreven, T.; Montgomery, J. A., Jr.; Peralta, J. E.; Ogliaro, F.; Bearpark, M.; Heyd, J. J.; Borthers, E.; Kudin, K. N.; Staroverov, V. N.; Kobayashi, R.; Normand, J.; Rahavachari, K.; Rendell, A.; Burant, J. C.; Iyengar, S. S.; Tomasi, J.; Cossi, M.; Rega, N.; Millam, J. M.; Klene, M.; Knox, J. E.; Cross, J. B.; Bakken, V.; Adamo, C.; Jaramillo, Gomperts, R.; Stratmann, R. E.; Yazyev, O.; Austin, A. J.; Cammi, R.; Pomelli, C.; Ochterski, J. W.; Martin, R. L.; Morokuma, K.; Zakrzewski, V. G.; Voth, G. A.; Salvador, P.; Dannenberg, J. J.; Dapprich, S.; Daniels, A. D.; Farkas, O.; Foresman, J. B.; Ortiz, J. V.; Cioslowski, J.; Fox, D. J. Gaussian, Inc. Wallingford CT, 2009.
- [3] Lu, T.; Chen, F. Multiwfn: a multifunctional wavefunction analyzer. *J. Comput. Chem.* **2012**, *33*, 580-592.
- [4] Lu, T.; Chen, Q. Interaction Region Indicator: A Simple Real Space Function Clearly Revealing Both Chemical Bonds and Weak Interactions\*\*. *Chemistry-Methods* **2021**, *1*, 231-239.
- [5] Humphrey, W.; Dalke, A.; Schulten, K. VMD: Visual Molecular Dynamics. *J. Mol. Graphics* **1996**, *14*, 33-38.
- [6] Riebe, S.; Vallet, C.; van der Vight, F.; Gonzalez-Abradelo, D.; Wölper, C.; Strassert, C. A.; Jansen, G.; Knauer, S.; Voskuhl, J. Aromatic Thioethers as Novel Luminophores with Aggregation-Induced Fluorescence and Phosphorescence. *Chem. Eur. J.* **2017**, *23*, 13660-13668.
- [7] Bi, X.; Shi, Y.; Peng, T.; Yue, S.; Wang, F.; Zheng, L.; Cao, Q. E. Multi-Stimuli Responsive and Multicolor Adjustable Pure Organic Room Temperature Fluorescence-Phosphorescent Dual-Emission Materials. *Adv. Funct. Mater.* **2021**, *31*, 2101312.
- [8] Wang, K.; Gao, Z.; Zhang, W.; Yan, Y.; Song, H.; Liu, X.; Zhou, Z.; Meng, H.; Xia, A.; Yao, J. Exciton funneling in light-harvesting organic semiconductor microcrystals for wavelength-tunable lasers. *Sci. Advance.* **2019**, *6*, eaaw2953.
- [9] Baronas, P., Kreiza, G., Mamada, M., Maedera, S., Adomėnas, P., Adomėnienė, O., Kazlauskas, K., Adachi, C., and Juršėnas, S. Enhanced energy transfer in doped bifluorene single crystals: prospects for organic lasers. *Adv. Opt. Mater.* **2020**, *8*, 1901670.
- [10] Wang, B., Yu, Y., Zhang, H., Xuan, Y., Chen, G., Ma, W., Li, J., and Yu, J. Carbon dots in a matrix: energy-transfer-enhanced room-temperature red phosphorescence. *Angew. Chem., Int. Ed.* **2019**, *58*, 18443- 18448.
